# Supplementary material for: Metagenomic Analysis of Bronchoalveolar Lavage Fluid Enables Differential Diagnosis Between Lung Cancer and Pulmonary Infections
Source: Research Square preprint supplement (doi:10.21203/rs.3.rs-3883914/v1), 2024-02-09
Supplement: Supplementary file 1 [file 02261ad14005163387e8dee4.xlsx]

## Sheet: Extended Data Table S1
Table S1. Microbiological results and malignancy diagnosis by cytology/flow cytometry/Pathological results of pulmonary disease patients
Patients ID	Library ID	Collecation Date	mNGS DNA Pathogen_Reads number	mNGS RNA Pathogen_Reads number	BALF microbiology	Genexpert	TSPOT	Cytology/Flow Cytometry/ Pathological Results	Diagnosis	Data Sets
Patient-001	ZY48	20210227	Tropheryma_whipplei_3571, Acinetobacter_baumannii_20	Negative	Acinetobacter_baumannii	Negative	Negative	Negative	Bacterial infection	Training Cohort
Patient-002	ZY148	20210313	Staphylococcus_aureus_1334581, Mycobacterium_intracellulare_51	Staphylococcus_aureus_2800	Negative	Negative	Negative	Negative	Bacterial infection	Training Cohort
Patient-003	ZY164	20210316	Pseudomonas_aeruginosa_92，Nocardia_5	Negative	Negative	Negative	Negative	Negative	Bacterial infection	Training Cohort
Patient-004	ZY189	20210318	Pseudomonas_aeruginosa_93241, Tropheryma_whipplei_6	Pseudomonas_aeruginosa_2782	Negative	Negative	Negative	Negative	Bacterial infection	Training Cohort
Patient-005	ZY315	20210402	Staphylococcus_aureus_8650	Negative	Negative	Negative	Negative	Negative	Bacterial infection	Training Cohort
Patient-006	ZY398	20210412	Acinetobacter_baumannii_74908，Streptococcus_pneumoniae_1045，	Streptococcus_pneumoniae_13	Acinetobacter_baumannii	Negative	Negative	Negative	Bacterial infection	Training Cohort
Patient-007	ZY469	20210419	Acinetobacter_baumannii_51647	Acinetobacter_baumannii_4218	Acinetobacter_baumannii	Negative	Negative	Negative	Bacterial infection	Training Cohort
Patient-008	ZY476	20210420	Parvimonas_micra_4786, Prevotella_175	Negative	Candida_albicans	Negative	Negative	Negative	Bacterial infection	Training Cohort
Patient-009	ZY491	20210421	Streptococcus_pseudopneumoniae_4,430, Pseudomonas_aeruginosa_1,030	Streptococcus_pseudopneumoniae_683	Pseudomonas_aeruginosa	Negative	Negative	Negative	Bacterial infection	Training Cohort
Patient-010	ZY545	20210427	Pseudomonas_aeruginosa_84	Negative	Pseudomonas_aeruginosa	Negative	Negative	Negative	Bacterial infection	Training Cohort
Patient-011	ZY547	20210427	Treponema_denticola_554Campylobacter_rectus_155Streptococcus_constellatus_30Fusobacterium_nucleatum_72	Negative	Negative	Negative	Negative	Negative	Bacterial infection	Training Cohort
Patient-012	ZY570	20210429	Fusobacterium_nucleatum_16,972,Filifactor_alocis 10,178, Streptococcus_mitis_77, Parvimonas_micra_334	Fusobacterium_nucleatum_1,305	Negative	Negative	Negative	Negative	Bacterial infection	Training Cohort
Patient-013	ZY571	20210429	Nocardia_654	Negative	Negative	Negative	Negative	Negative	Bacterial infection	Training Cohort
Patient-014	ZY634	20210507	Pseudomonas_aeruginosa_4578	Negative	Negative	Negative	Negative	Negative	Bacterial infection	Training Cohort
Patient-015	ZY711	20210517	Parvimonas_micra_10	Negative	Negative	Negative	Negative	Negative	Bacterial infection	Training Cohort
Patient-016	ZY914	20210603	arvimonas_micra_5,839, Porphyromonas_gingivalis_6,582, Campylobacter_671	Porphyromonas_gingivalis_386, Campylobacter_290	Negative	Negative	Negative	Negative	Bacterial infection	Training Cohort
Patient-017	ZY929	20210604	Parvimonas_micra_871, Streptococcus_constellatus_145, Porphyromonas_gingivalis_395, Prevotella_157, Filifactor_alocis 123	Negative	Negative	Negative	Negative	Negative	Bacterial infection	Training Cohort
Patient-018	ZY960	20210607	Actinomycetes_10,368, Porphyromonas_5,520, Fusobacterium_periodonticum_2,354, Parvimonas_micra_1,067	Negative	Negative	Negative	Negative	Negative	Bacterial infection	Training Cohort
Patient-019	ZY980	20210609	Prevotella_veroralis_280, Veillonella_parvula_195, Streptococcus_oralis_286, Parvimonas_micra_159	Negative	Candida_tropicalis	Negative	Negative	Negative	Bacterial infection	Training Cohort
Patient-020	ZY986	20210610	Gemella_haemolysans_16,587, Haemophilus_parainfluenzae_7,963, Porphyromonas_8,434, Fusobacterium_periodonticum_8,352, Staphylococcus_aureus_1,771, Parvimonas_micra_874	Negative	Staphylococcus_aureus	Negative	Negative	Negative	Bacterial infection	Training Cohort
Patient-021	ZY1023	20210612	Mycobacterium_intracellulare_11	Negative	Negative	Negative	Negative	Negative	Bacterial infection	Training Cohort
Patient-022	ZY1068	20210618	Porphyromonas_gingivalis_7,696, Peptostreptococcaceae_bacterium_oral_taxon_1131,772, Campylobacter_798, Treponema_denticola_818, Prevotella_145, Prevotella_145	Porphyromonas_gingivalis_1,420, Campylobacter_1,282	Negative	Negative	Negative	Negative	Bacterial infection	Training Cohort
Patient-023	ZY1106	20210622	Streptococcus_oralis_20,713, Pyramidobacter_piscolens_24,878, Peptostreptococcaceae_bacterium_oral_taxon_11315,967, Porphyromonas_gingivalis_10,086, Parvimonas_micra_6,142	Treponema_denticola_3,508, Prevotella_3,003, Porphyromonas_gingivalis_2,412	Negative	Negative	Negative	Negative	Bacterial infection	Training Cohort
Patient-024	ZY1151	20210625	Klebsiella_pneumoniae_1,021	Negative	Klebsiella_pneumoniae	Negative	Negative	Negative	Bacterial infection	Training Cohort
Patient-025	ZY1166	20210626	Escherichia_coli_4707, Klebsiella_pneumoniae_327	Escherichia_coli_289, Klebsiella_pneumoniae_22	Klebsiella_pneumoniae	Negative	Negative	Negative	Bacterial infection	Training Cohort
Patient-026	ZY1190	20210629	Klebsiella_pneumoniae_757,Stenotrophomonas_maltophilia_236	Negative	Negative	Negative	Negative	Negative	Bacterial infection	Training Cohort
Patient-027	ZY1244	20210703	Porphyromonas_gingivalis_18,189, Campylobacter_684, Treponema_denticola_287, Streptococcus_constellatus_41, Prevotella_12, Fusobacterium_nucleatum_44	Porphyromonas_gingivalis_8,672, Campylobacter_1,602	Negative	Negative	Negative	Negative	Bacterial infection	Training Cohort
Patient-028	ZY1260	20210705	Streptococcus_intermedius_39,724, Prevotella_31,099, Rothia_mucilaginosus_36,514, Porphyromonas_13,616, Fusobacterium_periodonticum_6,090, Parvimonas_micra_3,005	Prevotella_1,851	Negative	Negative	Negative	Negative	Bacterial infection	Training Cohort
Patient-029	ZY1287	20210707	Pseudomonas_aeruginosa_33552	Pseudomonas_aeruginosa_7295	Negative	Negative	Negative	Negative	Bacterial infection	Training Cohort
Patient-030	ZY1288	20210707	Haemophilus_parainfluenzae_9,128, Escherichia_coli_8,959, Stenotrophomonas_maltophilia_6,627, Ureaplasma_Parvum_80	Ureaplasma_Parvum_440	Negative	Negative	Negative	Negative	Bacterial infection	Training Cohort
Patient-031	ZY1394	20210716	Mycobacterium_abscessus_341，Pseudomonas_aeruginosa_10971	Mycobacterium_abscessus_10, Pseudomonas_aeruginosa_2143	Pseudomonas_aeruginosa	Negative	Negative	Negative	Bacterial infection	Training Cohort
Patient-032	ZY1425	20210720	Staphylococcus_aureus_81, Pseudomonas_aeruginosa_11	Staphylococcus_aureus_4	Klebsiella_Oxytoca	Negative	Negative	Negative	Bacterial infection	Training Cohort
Patient-033	ZY1469	20210723	Pseudomonas_aeruginosa_16,559Mycobacterium_abscessus_137	Pseudomonas_aeruginosa_2,611Mycobacterium_abscessus_13	Pseudomonas_aeruginosa	Negative	Negative	Negative	Bacterial infection	Training Cohort
Patient-034	ZY1505	20210726	Porphyromonas_gingivalis_1,118, Treponema_denticola_356, Campylobacter_256Filifactor_alocis 100	Porphyromonas_gingivalis_2,277, Campylobacter_596, Filifactor_alocis 80, Tannerella_forsythensis_46	Negative	Negative	Negative	Negative	Bacterial infection	Training Cohort
Patient-035	ZY1523	20210727	Klebsiella_pneumoniae_142	KlEBV_siella_pneumoniae_174	Klebsiella_pneumoniae	Negative	Negative	Negative	Bacterial infection	Training Cohort
Patient-036	ZY1533	20210728	Staphylococcus_aureus_3710	Staphylococcus_aureus_836	Staphylococcus_aureus	Negative	Negative	Negative	Bacterial infection	Training Cohort
Patient-037	ZY1548	20210729	Pseudomonas_aeruginosa_804, Parvimonas_micra_128, Tannerella_forsythensis_268, Prevotella_198	Tannerella_forsythensis_895Parvimonas_micra_215	Pseudomonas_aeruginosa	Negative	Negative	Negative	Bacterial infection	Training Cohort
Patient-038	ZY1625	20210804	Klebsiella_pneumoniae_55	Negative	Klebsiella_pneumoniae	Negative	Negative	Negative	Bacterial infection	Training Cohort
Patient-039	ZY1637	20210805	Tropheryma_whipplei_459Pseudomonas_aeruginosa_62	Negative	Negative	Negative	Negative	Negative	Bacterial infection	Training Cohort
Patient-040	ZY1658	20210806	Fusobacterium_nucleatum_5,820, Treponema_denticola_7,708, Filifactor_alocis 1,963	Fusobacterium_nucleatum_5,741, Treponema_denticola_5,236, Campylobacter_564, Filifactor_alocis 198	Pseudomonas_aeruginosa	Negative	Negative	Negative	Bacterial infection	Training Cohort
Patient-041	ZY1670	20210807	Pseudomonas_aeruginosa_19,007	Pseudomonas_aeruginosa_1,471	Pseudomonas_aeruginosa	Negative	Negative	Negative	Bacterial infection	Training Cohort
Patient-042	ZY1674	20210807	Staphylococcus_aureus_18,679	Negative	Negative	Negative	Negative	Negative	Bacterial infection	Training Cohort
Patient-043	ZY1727	20210811	Prevotella_5,432, Streptococcus_oralis_2,092	Prevotella_96	Negative	Negative	Negative	Negative	Bacterial infection	Training Cohort
Patient-044	ZY1732	20210811	Staphylococcus_aureus_3,812, Stenotrophomonas_maltophilia_890	Negative	Staphylococcus_aureus, Stenotrophomonas_maltophilia	Negative	Negative	Negative	Bacterial infection	Training Cohort
Patient-045	ZY1761	20210813	Klebsiella_pneumoniae_1,362	Klebsiella_pneumoniae_167	Negative	Negative	Negative	Negative	Bacterial infection	Training Cohort
Patient-046	ZY1823	20210817	Pseudomonas_aeruginosa_344	Negative	Negative	Negative	Negative	Negative	Bacterial infection	Training Cohort
Patient-047	ZY1868	20210820	Pseudomonas_aeruginosa_100,476	Pseudomonas_aeruginosa_18,091	Pseudomonas_aeruginosa	Negative	Negative	Negative	Bacterial infection	Training Cohort
Patient-048	ZY1869	20210820	Haemophilus_influenzae_901	Negative	Negative	Negative	Negative	Negative	Bacterial infection	Training Cohort
Patient-049	ZY1870	20210820	Haemophilus_parainfluenzae_2,523	Haemophilus_parainfluenzae_1,368	Negative	Negative	Negative	Negative	Bacterial infection	Training Cohort
Patient-050	ZY1887	20210821	Mycobacterium_intracellulare_73	Negative	Negative	Negative	Negative	Negative	Bacterial infection	Training Cohort
Patient-051	ZY1889	20210821	Burkholderia_multivorans_1,827	Negative	Burkholderia_multivorans	Negative	Negative	Negative	Bacterial infection	Training Cohort
Patient-052	ZY1934	20210825	Staphylococcus_aureus_59,369	Negative	Staphylococcus_aureus	Negative	Negative	Negative	Bacterial infection	Training Cohort
Patient-053	ZY1963	20210827	Mycobacterium_intracellulare_43	Negative	Negative	Negative	Negative	Negative	Bacterial infection	Training Cohort
Patient-054	ZY2044	20210903	Legionella_pneumophila_71	Legionella_pneumophila_17	Negative	Negative	Negative	Negative	Bacterial infection	Training Cohort
Patient-055	ZY2063	20210904	Haemophilus_parainfluenzae_4,613	Haemophilus_parainfluenzae_8,161	Negative	Negative	Negative	Negative	Bacterial infection	Training Cohort
Patient-056	ZY2080	20210906	Fusobacterium_nucleatum_2,159, Prevotella_2,845, Campylobacter_348	Fusobacterium_nucleatum_3,098, Prevotella_2,178, Campylobacter_935	Negative	Negative	Negative	Negative	Bacterial infection	Training Cohort
Patient-057	ZY2107	20210907	Klebsiella_pneumoniae_59Stenotrophomonas_maltophilia_87	Negative	Stenotrophomonas_maltophilia	Negative	Negative	Negative	Bacterial infection	Training Cohort
Patient-058	ZY2232	20210915	Haemophilus_influenzae_3,179	Haemophilus_influenzae_312	Haemophilus_influenzae	Negative	Negative	Negative	Bacterial infection	Training Cohort
Patient-059	ZY2245	20210916	Pseudomonas_aeruginosa_7,400	Negative	Pseudomonas_aeruginosa	Negative	Negative	Negative	Bacterial infection	Training Cohort
Patient-060	ZY2340	20210924	Mycobacterium_abscessus_24	Negative	Negative	Negative	Negative	Negative	Bacterial infection	Training Cohort
Patient-061	ZY2399	20210929	Porphyromonas_gingivalis_508, Streptococcus_constellatus_105, Fusobacterium_nucleatum_63	Porphyromonas_gingivalis_315, Fusobacterium_nucleatum_38, Streptococcus_constellatus_10	Negative	Negative	Negative	Negative	Bacterial infection	Training Cohort
Patient-062	ZY2431	20211004	Klebsiella_pneumoniae_511	Negative	Klebsiella_pneumoniae	Negative	Negative	Negative	Bacterial infection	Training Cohort
Patient-063	ZY2436	20211004	Porphyromonas_gingivalis_2,306, Neisseria_subflava_307, Filifactor_alocis_583, Prevotella_intermedius_421, Campylobacter_rectus_344, Fusobacterium_nucleatum_206, Fusarium_asiaticum_12	Negative	Negative	Negative	Negative	Negative	Bacterial infection	Training Cohort
Patient-064	ZY2531	20211012	Mycobacterium_intracellulare_22	Negative	Mycobacterium	Negative	Negative	Negative	Bacterial infection	Training Cohort
Patient-065	ZY2539	20211012	Klebsiella_pneumoniae_991, Pseudomonas_aeruginosa_123	Klebsiella_pneumoniae_2,689, Pseudomonas_aeruginosa_244	Klebsiella_pneumoniae	Negative	Negative	Negative	Bacterial infection	Training Cohort
Patient-066	ZY2597	20211015	Pseudomonas_aeruginosa_38,270	Pseudomonas_aeruginosa_2,769	Negative	Negative	Negative	Negative	Bacterial infection	Training Cohort
Patient-067	ZY2657	20211019	Porphyromonas_gingivalis_194,554, Tannerella_forsythensis_8,038, Prevotella_intermedius_651, Campylobacter_rectus_2,542, Fusobacterium_nucleatum_441	Porphyromonas_gingivalis_33,874, Campylobacter_rectus_2,134, Fusobacterium_nucleatum_546, Tannerella_forsythensis_420	Acinetobacter_baumannii	Negative	Negative	Negative	Bacterial infection	Training Cohort
Patient-068	ZY2689	20211021	Haemophilus_influenzae_3,350	Haemophilus_influenzae_3,842	Negative	Negative	Negative	Negative	Bacterial infection	Training Cohort
Patient-069	ZY2703	20211022	Serratia_marcescens_5,347, Staphylococcus_aureus_56	Negative	Serratia_marcescens	Negative	Negative	Negative	Bacterial infection	Training Cohort
Patient-070	ZY2709	20211022	Pseudomonas_aeruginosa_21,128	Pseudomonas_aeruginosa_1,337	Pseudomonas_aeruginosa	Negative	Negative	Negative	Bacterial infection	Training Cohort
Patient-071	ZY2765	20211026	Pyramidobacter_piscolens_5,102, Porphyromonas_gingivalis_2,509, Parvimonas_micra_534, Prevotella_intermedius_141	Negative	Negative	Negative	Negative	Negative	Bacterial infection	Training Cohort
Patient-072	ZY2804	20211028	Pseudomonas_aeruginosa_109,864	Pseudomonas_aeruginosa_20,645	Pseudomonas_aeruginosa	Negative	Negative	Negative	Bacterial infection	Training Cohort
Patient-073	ZY2808	20211028	Legionella_feeleii_21	Negative	Actinomycetes	Negative	Negative	Negative	Bacterial infection	Training Cohort
Patient-074	ZY2851	20211101	Streptococcus_pneumoniae_29,826, Haemophilus_influenzae_6,532, Moraxella_catarrhalis_11,915	Haemophilus_influenzae_2,276, Moraxella_catarrhalis_6,995, Streptococcus_pneumoniae_215	Streptococcus_pneumoniae	Negative	Negative	Negative	Bacterial infection	Training Cohort
Patient-075	ZY2877	20211103	Streptococcus_pseudopneumoniae_2,916, Pseudomonas_aeruginosa_1,306	Streptococcus_pseudopneumoniae_109	Negative	Negative	Negative	Negative	Bacterial infection	Training Cohort
Patient-076	ZY2936	20211106	Burkholderia_cenocepacia_681, Pseudomonas_aeruginosa_599, Stenotrophomonas_maltophilia_436, Acinetobacter_baumannii_66, Klebsiella_pneumoniae_8	Negative	Burkholderia_cenocepacia, Klebsiella_pneumoniae	Negative	Negative	Negative	Bacterial infection	Training Cohort
Patient-077	ZY3087	20211116	Pseudomonas_aeruginosa_40,683	Pseudomonas_aeruginosa_20,670	Pseudomonas_aeruginosa	Negative	Negative	Negative	Bacterial infection	Training Cohort
Patient-078	ZY3109	20211117	Staphylococcus_aureus_3451	Negative	Klebsiella_pneumoniae	Negative	Negative	Negative	Bacterial infection	Training Cohort
Patient-079	ZY3110	20211117	Staphylococcus_aureus_3,295	Negative	Staphylococcus_aureus	Negative	Negative	Negative	Bacterial infection	Training Cohort
Patient-080	ZY3159	20211120	Pseudomonas_aeruginosa_17,234	Pseudomonas_aeruginosa_10,489	Pseudomonas_aeruginosa	Negative	Negative	Negative	Bacterial infection	Training Cohort
Patient-081	ZY3186	20211123	Burkholderia_multivorans_248	Negative	Burkholderia_multivorans	Negative	Negative	Negative	Bacterial infection	Validation Cohort
Patient-082	ZY3207	20211124	Pseudomonas_aeruginosa_5,608, Streptococcus_pneumoniae_346	Negative	Negative	Negative	Negative	Negative	Bacterial infection	Validation Cohort
Patient-083	ZY3224	20211125	Streptococcus_pneumoniae_13	Negative	Streptococcus_pneumoniae	Negative	Negative	Negative	Bacterial infection	Validation Cohort
Patient-084	ZY3358	20211204	Acinetobacter_baumannii_39,760	Acinetobacter_baumannii_12,549	Acinetobacter_baumannii	Negative	Negative	Negative	Bacterial infection	Validation Cohort
Patient-085	ZY3492	20211215	Staphylococcus_aureus_249	Negative	Negative	Negative	Negative	Negative	Bacterial infection	Validation Cohort
Patient-086	ZY3498	20211215	Acinetobacter_baumannii_1,118	Acinetobacter_baumannii_3,611	Acinetobacter_baumannii	Negative	Negative	Negative	Bacterial infection	Validation Cohort
Patient-087	ZY3509	20211216	Porphyromonas_gingivalis_1,715, Tannerella_forsythensis_1,991, Campylobacter_rectus_736, Fusobacterium_nucleatum_136, Streptococcus_anginosus_99	Porphyromonas_gingivalis_17,884, Campylobacter_rectus_4,001, Tannerella_forsythensis_7,002, Fusobacterium_nucleatum_1,680, Streptococcus_anginosus_24	Negative	Negative	Negative	Negative	Bacterial infection	Validation Cohort
Patient-088	ZY3539	20211218	Prevotella_9,236, Fusobacterium_nucleatum_1,061, Streptococcus_oralis_761	Prevotella_12,830, Fusobacterium_nucleatum_1,383, Streptococcus_oralis_167	Prevotella_	Negative	Negative	Negative	Bacterial infection	Validation Cohort
Patient-089	ZY3598	20211223	Porphyromonas_gingivalis_17,136, Treponema_denticola_1,744, Streptococcus_constellatus_942, Campylobacter_rectus_1,237	Campylobacter_rectus_123, Streptococcus_constellatus_8, Porphyromonas_gingivalis_50	Acinetobacter_baumannii	Negative	Negative	Negative	Bacterial infection	Validation Cohort
Patient-090	ZY3599	20211223	Tannerella_forsythensis_363	Tannerella_forsythensis_630	Negative	Negative	Negative	Negative	Bacterial infection	Validation Cohort
Patient-091	ZY3616	20211224	Porphyromonas_gingivalis_2,880, Fusobacterium_nucleatum_232, Prevotella_171	Porphyromonas_gingivalis_11,356, Fusobacterium_nucleatum_412, Campylobacter_rectus_806	Negative	Negative	Negative	Negative	Bacterial infection	Validation Cohort
Patient-092	ZY3696	20211229	Streptococcus_pneumoniae_12	Negative	Streptococcus_pneumoniae	Negative	Negative	Negative	Bacterial infection	Validation Cohort
Patient-093	ZY3711	20211230	Haemophilus_influenzae_21	Negative	Haemophilus_influenzae	Negative	Negative	Negative	Bacterial infection	Validation Cohort
Patient-094	ZY3780	20220105	Haemophilus_influenzae_10,389	Haemophilus_influenzae_15,837	Negative	Negative	Negative	Negative	Bacterial infection	Validation Cohort
Patient-095	ZY3876	20220111	Burkholderia_cenocepacia_8,163, Elizabethkingia_1,117, Acinetobacter_baumannii_483	Burkholderia_cenocepacia_1,213, Elizabethkingia_51	Burkholderia_cenocepacia, Flavobacterium_meningosepticum	Negative	Negative	Negative	Bacterial infection	Validation Cohort
Patient-096	ZY3896	20220112	Pseudomonas_aeruginosa_104,968	Pseudomonas_aeruginosa_45,133	Pseudomonas_aeruginosa	Negative	Negative	Negative	Bacterial infection	Validation Cohort
Patient-097	ZY3900	20220112	Porphyromonas_gingivalis_1,029, Campylobacter_rectus_111	Negative	Negative	Negative	Negative	Negative	Bacterial infection	Validation Cohort
Patient-098	ZY4024	20220119	Porphyromonas_gingivalis_3,202, Treponema_denticola_1,595, Streptococcus_oralis_578, Parvimonas_micra_247	Porphyromonas_gingivalis_2,454, Treponema_denticola_1,833, Parvimonas_micra_185Streptococcus_oralis_93	Negative	Negative	Negative	Negative	Bacterial infection	Validation Cohort
Patient-099	ZY4065	20220122	Fusobacterium_nucleatum_322, Rothia_mucilaginosus_74	Negative	Negative	Negative	Negative	Negative	Bacterial infection	Validation Cohort
Patient-100	ZY4134	20220127	Pseudomonas_aeruginosa_130,923	Pseudomonas_aeruginosa_33,317	Pseudomonas_aeruginosa	Negative	Negative	Negative	Bacterial infection	Validation Cohort
Patient-101	ZY4140	20220127	Tannerella_forsythensis_56,145, Pyramidobacter_piscolens_13,622, Porphyromonas_gingivalis_2,693, Campylobacter_rectus_2,269, Parvimonas_micra_1,235, Filifactor_alocis_859, Streptococcus_oralis_698, Pseudomonas_aeruginosa_385	Pyramidobacter_piscolens_49,415, Tannerella_forsythensis_13,173, Porphyromonas_gingivalis_2,788	Pseudomonas_aeruginosa	Negative	Negative	Negative	Bacterial infection	Validation Cohort
Patient-102	ZY4295	20220210	Rothia_mucilaginosus_10,160, Treponema_denticola_3,810, Fusobacterium_nucleatum_1,884, Porphyromonas_gingivalis_3,783, Parvimonas_micra_296, Staphylococcus_aureus_301, Filifactor_alocis 288	Treponema_denticola_514Porphyromonas_gingivalis_689Fusobacterium_nucleatum_146Parvimonas_micra_332	Negative	Negative	Negative	Negative	Bacterial infection	Validation Cohort
Patient-103	ZY4508	20220224	Streptococcus_pneumoniae_50Haemophilus_influenzae_88Pseudomonas_aeruginosa_55	Pseudomonas_aeruginosa_89, Haemophilus_influenzae_327, Streptococcus_pneumoniae_3	Negative	Negative	Negative	Negative	Bacterial infection	Validation Cohort
Patient-104	ZY4588	20220301	Haemophilus_influenzae_3,575	Haemophilus_influenzae_8,312	Negative	Negative	Negative	Negative	Bacterial infection	Validation Cohort
Patient-105	ZY4658	20220305	Pseudomonas_aeruginosa_15,859	Pseudomonas_aeruginosa_22,796	Pseudomonas_aeruginosa	Negative	Negative	Negative	Bacterial infection	Validation Cohort
Patient-106	ZY4689	20220308	Haemophilus_influenzae_317	Haemophilus_influenzae_245	Negative	Negative	Negative	Negative	Bacterial infection	Validation Cohort
Patient-107	ZY4765	20220311	Pseudomonas_aeruginosa_3,595, Mycobacterium_intracellulare_16	Pseudomonas_aeruginosa_11,963	Pseudomonas_aeruginosa	Negative	Negative	Negative	Bacterial infection	Validation Cohort
Patient-108	ZY4888	20220318	Pseudomonas_aeruginosa_1,630, Candida glabrata_234	Negative	Negative	Negative	Negative	Negative	Bacterial infection	Validation Cohort
Patient-109	ZY4898	20220319	Klebsiella_pneumoniae_836	Negative	Negative	Negative	Negative	Negative	Bacterial infection	Validation Cohort
Patient-110	ZY4906	20220319	Streptococcus_anginosus_111	Streptococcus_anginosus_9	Negative	Negative	Negative	Negative	Bacterial infection	Validation Cohort
Patient-111	ZY4939	20220322	Pseudomonas_aeruginosa_760	Negative	Candida_albicans, Pseudomonas_aeruginosa	Negative	Negative	Negative	Bacterial infection	Validation Cohort
Patient-112	ZY5164	20220406	Legionella_longbeachae_6,940	Legionella_longbeachae_237	Negative	Negative	Negative	Negative	Bacterial infection	Validation Cohort
Patient-113	ZY6420	20220610	Stenotrophomonas_maltophilia_259	Stenotrophomonas_maltophilia_57	Stenotrophomonas_maltophilia	Negative	Negative	Negative	Bacterial infection	Validation Cohort
Patient-114	ZY6660	20220623	Porphyromonas_gingivalis_14,554, Prevotella_intermedius_9,321, Fusobacterium_periodonticum_1,359, Fusobacterium_nucleatum_627, Parvimonas_micra_939, Filifactor_alocis 627, Tannerella_forsythensis_678	Porphyromonas_gingivalis_4,332, Fusobacterium_nucleatum_1,895, Prevotella_intermedius_2,842, Parvimonas_micra_748, Tannerella_forsythensis_594	Negative	Negative	Negative	Negative	Bacterial infection	Validation Cohort
Patient-115	ZY143	20210312	Aspergillus_fumigatus_，287	Pneumocystis_jirovecii_51	Candida_albicans	Negative	Negative	Negative	Fungal infection	Training Cohort
Patient-116	ZY282	20210330	Cryptococcus_neoformans_173	Negative	Cryptococcus_neoformans	Negative	Negative	Negative	Fungal infection	Training Cohort
Patient-117	ZY301	20210401	Cryptococcus_neoformans_2	Negative	Negative	Negative	Negative	Negative	Fungal infection	Training Cohort
Patient-118	ZY374	20210409	Aspergillus_fumigatus_8	Negative	Negative	Negative	Negative	Negative	Fungal infection	Training Cohort
Patient-119	ZY384	20210410	Pneumocystis_jirovecii_1530	Pneumocystis_jirovecii_16791	Negative	Negative	Negative	Negative	Fungal infection	Training Cohort
Patient-120	ZY411	20210413	Pneumocystis_jirovecii_13	Pneumocystis_jirovecii_55	Negative	Negative	Negative	Negative	Fungal infection	Training Cohort
Patient-121	ZY468	20210419	Pneumocystis_jirovecii_403	Pneumocystis_jirovecii_220	Negative	Negative	Negative	Negative	Fungal infection	Training Cohort
Patient-122	ZY475	20210420	Aspergillus_fumigatus_2	Negative	Negative	Negative	Negative	Negative	Fungal infection	Training Cohort
Patient-123	ZY562	20210428	Pneumocystis_jirovecii_2	Pneumocystis_jirovecii_55	Negative	Negative	Negative	Negative	Fungal infection	Training Cohort
Patient-124	ZY691	20210514	Pneumocystis_jirovecii_223	Pneumocystis_jirovecii_5690	Negative	Negative	Negative	Negative	Fungal infection	Training Cohort
Patient-125	ZY872	20210601	Aspergillus_oryzae_8	Negative	Negative	Negative	Negative	Negative	Fungal infection	Training Cohort
Patient-126	ZY876	20210601	Pneumocystis_jirovecii_3466	CMV_154, Pneumocystis_jirovecii_27900	Negative	Negative	Negative	Negative	Fungal infection	Training Cohort
Patient-127	ZY908	20210603	Cryptococcus_neoformans_4	Negative	Candida glabrata	Negative	Negative	Negative	Fungal infection	Training Cohort
Patient-128	ZY939	20210604	Morococcus_cerebrosus724, Aspergillus_flavus_7, EBV_4	CMV_17，EBV_5	Negative	Negative	Negative	Negative	Fungal infection	Training Cohort
Patient-129	ZY1025	20210612	Pneumocystis_jirovecii_5	Negative	Negative	Negative	Negative	Negative	Fungal infection	Training Cohort
Patient-130	ZY1058	20210617	Pneumocystis_jirovecii_200027	Pneumocystis_jirovecii_1438591	Negative	Negative	Negative	Negative	Fungal infection	Training Cohort
Patient-131	ZY1086	20210619	Cryptococcus_neoformans_133	Negative	Negative	Negative	Negative	Negative	Fungal infection	Training Cohort
Patient-132	ZY1152	20210625	Tropheryma_whipplei_4,123	Negative	Negative	Negative	Negative	Negative	Fungal infection	Training Cohort
Patient-133	ZY1275	20210706	Pneumocystis_jirovecii_3，Aspergillus_fumigatus_，1	Pneumocystis_jirovecii_46	Negative	Negative	Negative	Negative	Fungal infection	Training Cohort
Patient-134	ZY1291	20210707	Cryptococcus_neoformans_，110	Negative	Cryptococcus_neoformans	Negative	Negative	Negative	Fungal infection	Training Cohort
Patient-135	ZY1318	20210709	Aspergillus_fumigatus_1	Negative	Negative	Negative	Negative	Negative	Fungal infection	Training Cohort
Patient-136	ZY1329	20210710	Talaromyces_marneffei_853052	Talaromyces_marneffei_29116	Talaromyces_marneffei	Negative	Negative	Negative	Fungal infection	Training Cohort
Patient-137	ZY1357	20210713	Aspergillus_fumigatus_23	Negative	Aspergillus_fumigatus	Negative	Negative	Negative	Fungal infection	Training Cohort
Patient-138	ZY1397	20210716	Aspergillus_fumigatus_11	EBV_26	Negative	Negative	Negative	Negative	Fungal infection	Training Cohort
Patient-139	ZY1412	20210719	Cryptococcus_neoformans_8	Negative	Negative	Negative	Negative	Negative	Fungal infection	Training Cohort
Patient-140	ZY1587	20210731	Nectria_haematococca32	Negative	Fusarium_Solani	Negative	Negative	Negative	Fungal infection	Training Cohort
Patient-141	ZY1710	20210810	Candida_albicans_708, Pneumocystis_jirovecii_13	Pneumocystis_jirovecii_109	Negative	Negative	Negative	Negative	Fungal infection	Training Cohort
Patient-142	ZY1711	20210810	Candida_tropicalis_233,006, Aspergillus_flavus_75, Aspergillus_fumigatus_70, Cryptococcus_neoformans_24, CMV 2	Candida_tropicalis_189	Aspergillus_flavus	Negative	Negative	Negative	Fungal infection	Training Cohort
Patient-143	ZY2019	20210901	Penicillium_steckii 2	Negative	Penicillium	Negative	Negative	Negative	Fungal infection	Training Cohort
Patient-144	ZY2027	20210902	Cryptococcus_neoformans_715	Negative	Negative	Negative	Negative	Negative	Fungal infection	Training Cohort
Patient-145	ZY2057	20210904	Aspergillus_flavus_117	Negative	Negative	Negative	Negative	Negative	Fungal infection	Training Cohort
Patient-146	ZY2105	20210907	Candida_tropicalis_12,246	Candida_tropicalis_25	Negative	Negative	Negative	Negative	Fungal infection	Training Cohort
Patient-147	ZY2145	20210909	Pneumocystis_jirovecii_15,570	Pneumocystis_jirovecii_57,295	Negative	Negative	Negative	Negative	Fungal infection	Training Cohort
Patient-148	ZY2230	20210915	Pneumocystis_jirovecii_1	Pneumocystis_jirovecii_64	Negative	Negative	Negative	Negative	Fungal infection	Training Cohort
Patient-149	ZY2319	20210923	Aspergillus_fumigatus_3	Negative	Negative	Negative	Negative	Negative	Fungal infection	Training Cohort
Patient-150	ZY2339	20210924	Cryptococcus_neoformans_5	Negative	Negative	Negative	Negative	Negative	Fungal infection	Training Cohort
Patient-151	ZY3019	20211112	Stenotrophomonas_maltophilia_6,876, Scedosporium_apiospermum_3	Negative	Negative	Negative	Negative	Negative	Fungal infection	Training Cohort
Patient-152	ZY3056	20211115	Candida_albicans_370	Negative	Negative	Negative	Negative	Negative	Fungal infection	Training Cohort
Patient-153	ZY3106	20211117	Scedosporium_apiospermum_179	Scedosporium_apiospermum_1	Scedosporium_apiospermum	Negative	Negative	Negative	Fungal infection	Training Cohort
Patient-154	ZY3140	20211119	Pneumocystis_jirovecii_184	Pneumocystis_jirovecii_4,396	Negative	Negative	Negative	Negative	Fungal infection	Training Cohort
Patient-155	ZY3291	20211130	Pneumocystis_jirovecii_92, Aspergillus_niger_9	Pneumocystis_jirovecii_18	Negative	Negative	Negative	Negative	Fungal infection	Training Cohort
Patient-156	ZY3401	20211208	Aspergillus_niger_15	Negative	Negative	Negative	Negative	Negative	Fungal infection	Training Cohort
Patient-157	ZY3531	20211217	Aspergillus_flavus_5	Negative	Aspergillus_flavus	Negative	Negative	Negative	Fungal infection	Training Cohort
Patient-158	ZY3532	20211217	Aspergillus_steynii 7	Negative	Penicillium	Negative	Negative	Negative	Fungal infection	Training Cohort
Patient-159	ZY3572	20211221	Cryptococcus_neoformans_119	Negative	Negative	Negative	Negative	Negative	Fungal infection	Training Cohort
Patient-160	ZY3766	20220104	Candida_tropicalis_826, Candida glabrata_803, Candida_albicans_762	Candida_tropicalis_66, Candida_albicans_25, Candida glabrata_8	Candida_tropicalis, Candida glabrata	Negative	Negative	Negative	Fungal infection	Training Cohort
Patient-161	ZY3899	20220112	Aspergillus_fumigatus_998	Negative	Aspergillus_fumigatus	Negative	Negative	Negative	Fungal infection	Training Cohort
Patient-162	ZY3938	20220114	Schizophyllum_commune_220	Negative	Schizophyllum_commune	Negative	Negative	Negative	Fungal infection	Training Cohort
Patient-163	ZY3958	20220115	Negative	Pneumocystis_jirovecii_12	Negative	Negative	Negative	Negative	Fungal infection	Training Cohort
Patient-164	ZY3999	20220118	Cryptococcus_neoformans_59	Negative	Negative	Negative	Negative	Negative	Fungal infection	Training Cohort
Patient-165	ZY4100	20220125	Aspergillus_fumigatus_12	Negative	Negative	Negative	Negative	Negative	Fungal infection	Training Cohort
Patient-166	ZY4331	20220212	Pneumocystis_jirovecii_160	Pneumocystis_jirovecii_6,525	Negative	Negative	Negative	Negative	Fungal infection	Training Cohort
Patient-167	ZY4370	20220215	Cryptococcus_neoformans_870	Cryptococcus_neoformans_10	Negative	Negative	Negative	Negative	Fungal infection	Training Cohort
Patient-168	ZY4373	20220215	Pneumocystis_jirovecii_17,222	Pneumocystis_jirovecii_118,260	Candida_albicans	Negative	Negative	Negative	Fungal infection	Training Cohort
Patient-169	ZY4431	20220218	Pneumocystis_jirovecii_85, 4Cryptococcus_neoformans_1,125	Pneumocystis_jirovecii_28, Cryptococcus_neoformans_5	Cryptococcus_neoformans	Negative	Negative	Negative	Fungal infection	Training Cohort
Patient-170	ZY4553	20220226	Pneumocystis_jirovecii_3	Pneumocystis_jirovecii_21	Negative	Negative	Negative	Negative	Fungal infection	Training Cohort
Patient-171	ZY4646	20220304	Talaromyces_marneffei_124	Negative	Aspergillus_fumigatus	Negative	Negative	Negative	Fungal infection	Validation Cohort
Patient-172	ZY4691	20220308	Talaromyces_marneffei_5,076	Negative	Talaromyces_marneffei	Negative	Negative	Negative	Fungal infection	Validation Cohort
Patient-173	ZY13380	20230401	Aspergillus_fumigatus_33, Pneumocystis_jirovecii_9	Pneumocystis_jirovecii_1	Negative	Negative	Negative	Negative	Fungal infection	Validation Cohort
Patient-174	ZY13504	20230406	Aspergillus_niger_12	Negative	Negative	Negative	Negative	Negative	Fungal infection	Validation Cohort
Patient-175	ZY13737	20230414	Aspergillus_fumigatus_48 Rhizopus_delemar_3	Negative	Negative	Negative	Negative	Negative	Fungal infection	Validation Cohort
Patient-176	ZY13874	20230419	Aspergillus_fumigatus_1 Rhizopus_oligosporus_2	Negative	Negative	Negative	Negative	Negative	Fungal infection	Validation Cohort
Patient-177	ZY13952	20230421	Aspergillus_fumigatus_1,659	Negative	Negative	Negative	Negative	Negative	Fungal infection	Validation Cohort
Patient-178	ZY13960	20230421	Aspergillus_fumigatus_2	Negative	Negative	Negative	Negative	Negative	Fungal infection	Validation Cohort
Patient-179	ZY14662	20230516	Aspergillus_fumigatus_464	Negative	Negative	Negative	Negative	Negative	Fungal infection	Validation Cohort
Patient-180	ZY14679	20230516	Aspergillus_fumigatus_956	Negative	Negative	Negative	Negative	Negative	Fungal infection	Validation Cohort
Patient-181	ZY14857	20230523	Aspergillus_flavus_1,089	Negative	Negative	Negative	Negative	Negative	Fungal infection	Validation Cohort
Patient-182	ZY14884	20230524	Aspergillus_fumigatus_1,393	Negative	Negative	Negative	Negative	Negative	Fungal infection	Validation Cohort
Patient-183	ZY14886	20230524	Aspergillus_fumigatus_689	Negative	Negative	Negative	Negative	Negative	Fungal infection	Validation Cohort
Patient-184	ZY14993	20230527	Candida_albicans_16,297, Aspergillus_flavus_3	Negative	Negative	Negative	Negative	Negative	Fungal infection	Validation Cohort
Patient-185	ZY15217	20230603	Aspergillus_fumigatus_28	Negative	Negative	Negative	Negative	Negative	Fungal infection	Validation Cohort
Patient-186	ZY15387	20230609	Aspergillus_flavus_9	Negative	Negative	Negative	Negative	Negative	Fungal infection	Validation Cohort
Patient-187	ZY15411	20230610	Aspergillus_fumigatus_9	Negative	Negative	Negative	Negative	Negative	Fungal infection	Validation Cohort
Patient-188	ZY15417	20230610	Aspergillus_fumigatus_7	Negative	Negative	Negative	Negative	Negative	Fungal infection	Validation Cohort
Patient-189	ZY15462	20230613	Aspergillus_flavus_9	Negative	Negative	Negative	Negative	Negative	Fungal infection	Validation Cohort
Patient-190	ZY15502	20230614	Pneumocystis_jirovecii_23, Aspergillus_fumigatus_4	Pneumocystis_jirovecii_355	Negative	Negative	Negative	Negative	Fungal infection	Validation Cohort
Patient-191	ZY15574	20230616	Aspergillus_fumigatus_20	Negative	Negative	Negative	Negative	Negative	Fungal infection	Validation Cohort
Patient-192	ZY15666	20230620	Aspergillus_flavus_19	Negative	Negative	Negative	Negative	Negative	Fungal infection	Validation Cohort
Patient-193	ZY15693	20230621	Aspergillus_fumigatus_2	Negative	Negative	Negative	Negative	Negative	Fungal infection	Validation Cohort
Patient-194	ZY116	20210309	Streptococcus_mitis_7575	Negative	Negative	Negative	Negative	Squamous cell carcinoma	Lung cancer	Training Cohort
Patient-195	ZY209	20210319	Negative	Negative	Negative	Negative	Negative	Squamous cell carcinoma	Lung cancer	Training Cohort
Patient-196	ZY229	20210323	Negative	Negative	Negative	Negative	Negative	Squamous cell carcinoma	Lung cancer	Training Cohort
Patient-197	ZY247	20210325	EBV_44	Negative	Negative	Negative	Negative	Squamous cell carcinoma	Lung cancer	Training Cohort
Patient-198	ZY257	20210326	Negative	Negative	Negative	Negative	Negative	Squamous cell carcinoma	Lung cancer	Training Cohort
Patient-199	ZY275	20210329	Negative	CMV_5	Negative	Negative	Negative	Squamous cell carcinoma	Lung cancer	Training Cohort
Patient-200	ZY278	20210330	Negative	Negative	Negative	Negative	Negative	Squamous cell carcinoma	Lung cancer	Training Cohort
Patient-201	ZY280	20210330	EBV_1	EBV_1	Negative	Negative	Negative	Adenocarcarcinoma	Lung cancer	Training Cohort
Patient-202	ZY281	20210330	Negative	Negative	Negative	Negative	Negative	Adenocarcarcinoma	Lung cancer	Training Cohort
Patient-203	ZY380	20210410	EBV_2	Negative	Negative	Negative	Negative	Adenocarcarcinoma	Lung cancer	Training Cohort
Patient-204	ZY437	20210415	Negative	Negative	Negative	Negative	Negative	Adenocarcarcinoma	Lung cancer	Training Cohort
Patient-205	ZY573	20210429	Negative	Negative	Negative	Negative	Negative	Adenocarcarcinoma（EGFR mutation)	Lung cancer	Training Cohort
Patient-206	ZY585	20210430	Negative	Negative	Negative	Negative	Negative	Adenocarcarcinoma	Lung cancer	Training Cohort
Patient-207	ZY629	20210507	Negative	Negative	Negative	Negative	Negative	Adenocarcarcinoma	Lung cancer	Training Cohort
Patient-208	ZY785	20210524	Negative	Negative	Negative	Negative	Negative	Adenocarcarcinoma	Lung cancer	Training Cohort
Patient-209	ZY812	20210526	Negative	Negative	Negative	Negative	Negative	Adenocarcarcinoma	Lung cancer	Training Cohort
Patient-210	ZY840	20210528	Negative	Negative	Negative	Negative	Negative	Adenocarcarcinoma	Lung cancer	Training Cohort
Patient-211	ZY891	20210602	Entercoccus_faecalis_2,047	Negative	Negative	Negative	Negative	SCLC	Lung cancer	Training Cohort
Patient-212	ZY905	20210603	Negative	Negative	Negative	Negative	Negative	Adenocarcarcinoma（EGFR mutation)	Lung cancer	Training Cohort
Patient-213	ZY907	20210603	CMV_22	Negative	Negative	Negative	Negative	Squamous cell carcinoma	Lung cancer	Training Cohort
Patient-214	ZY932	20210604	Negative	Negative	Negative	Negative	Negative	Adenocarcarcinoma	Lung cancer	Training Cohort
Patient-215	ZY1059	20210617	Candida_albicans_23,888, CMV_3	Candida_albicans_8	Negative	Negative	Negative	Adenocarcarcinoma（EGFR mutation)	Lung cancer	Training Cohort
Patient-216	ZY1067	20210618	Negative	Negative	Negative	Negative	Negative	Adenocarcarcinoma	Lung cancer	Training Cohort
Patient-217	ZY1069	20210618	Negative	EBV_7	Negative	Negative	Negative	Squamous cell carcinoma	Lung cancer	Training Cohort
Patient-218	ZY1070	20210618	Negative	Negative	Negative	Negative	Negative	Adenocarcarcinoma	Lung cancer	Training Cohort
Patient-219	ZY1083	20210619	Negative	Negative	Negative	Negative	Negative	Adenocarcarcinoma	Lung cancer	Training Cohort
Patient-220	ZY1122	20210623	Negative	Negative	Negative	Negative	Negative	Adenocarcarcinoma	Lung cancer	Training Cohort
Patient-221	ZY1179	20210628	Negative	Negative	Negative	Negative	Negative	Adenocarcarcinoma	Lung cancer	Training Cohort
Patient-222	ZY1208	20210630	Negative	Negative	Negative	Negative	Negative	Adenocarcarcinoma	Lung cancer	Training Cohort
Patient-223	ZY1218	20210701	Pneumocystis_jirovecii_24	Negative	Negative	Negative	Negative	Adenocarcarcinoma	Lung cancer	Training Cohort
Patient-224	ZY1229	20210702	Negative	Negative	Negative	Negative	Negative	Adenocarcarcinoma	Lung cancer	Training Cohort
Patient-225	ZY1242	20210703	CMV_34	CMV_3	Negative	Negative	Negative	Squamous cell carcinoma	Lung cancer	Training Cohort
Patient-226	ZY1331	20210710	HHV7_3	Negative	Negative	Negative	Negative	Squamous cell carcinoma	Lung cancer	Training Cohort
Patient-227	ZY1343	20210712	Negative	Negative	Negative	Negative	Negative	Adenocarcarcinoma	Lung cancer	Training Cohort
Patient-228	ZY1358	20210713	Negative	Negative	Negative	Negative	Negative	Squamous cell carcinoma	Lung cancer	Training Cohort
Patient-229	ZY1368	20210714	Negative	Negative	Negative	Negative	Negative	Adenocarcarcinoma	Lung cancer	Training Cohort
Patient-230	ZY1392	20210716	Negative	Negative	Negative	Negative	Negative	Squamous cell carcinoma	Lung cancer	Training Cohort
Patient-231	ZY1471	20210723	Candida_albicans_3,393, EBV_101	CMV_43, EBV_V29	Negative	Negative	Negative	SCLC	Lung cancer	Training Cohort
Patient-232	ZY1537	20210728	CMV_23	Negative	Negative	Negative	Negative	Squamous cell carcinoma	Lung cancer	Training Cohort
Patient-233	ZY1549	20210729	Negative	Negative	Negative	Negative	Negative	Adenocarcarcinoma	Lung cancer	Training Cohort
Patient-234	ZY1565	20210730	Negative	Negative	Negative	Negative	Negative	Adenocarcarcinoma	Lung cancer	Training Cohort
Patient-235	ZY1573	20210730	Negative	Negative	Negative	Negative	Negative	Squamous cell carcinoma	Lung cancer	Training Cohort
Patient-236	ZY1574	20210730	Negative	Negative	Negative	Negative	Negative	Adenocarcarcinoma	Lung cancer	Training Cohort
Patient-237	ZY1583	20210731	Negative	Negative	Negative	Negative	Negative	Mucinous adenocarcinoma(KRAS mutation)	Lung cancer	Training Cohort
Patient-238	ZY1606	20210802	Negative	Negative	Negative	Negative	Negative	Adenocarcarcinoma	Lung cancer	Training Cohort
Patient-239	ZY1622	20210804	Negative	Negative	Negative	Negative	Negative	Adenocarcarcinoma	Lung cancer	Training Cohort
Patient-240	ZY1643	20210805	Mycobacterium_intracellulare_4	Negative	Negative	Negative	Negative	Adenocarcarcinoma	Lung cancer	Training Cohort
Patient-241	ZY1675	20210807	Negative	Negative	Negative	Negative	Negative	Adenocarcarcinoma	Lung cancer	Training Cohort
Patient-242	ZY1743	20210812	EBV_433	EBV_1	Negative	Negative	Negative	Adenocarcarcinoma	Lung cancer	Training Cohort
Patient-243	ZY1784	20210814	EBV_3	CMV_16	Negative	Negative	Negative	Mucinous adenocarcinoma(KRAS mutation)	Lung cancer	Training Cohort
Patient-244	ZY1801	20210816	Negative	Negative	Negative	Negative	Negative	Adenocarcarcinoma	Lung cancer	Training Cohort
Patient-245	ZY1846	20210819	Negative	Negative	Negative	Negative	Negative	Squamous cell carcinoma	Lung cancer	Training Cohort
Patient-246	ZY1948	20210826	Negative	Negative	Negative	Negative	Negative	Adenocarcarcinoma	Lung cancer	Training Cohort
Patient-247	ZY1950	20210826	Negative	Negative	Negative	Negative	Negative	Adenocarcarcinoma	Lung cancer	Training Cohort
Patient-248	ZY1961	20210827	Negative	Negative	Negative	Negative	Negative	SCLC	Lung cancer	Training Cohort
Patient-249	ZY1962	20210827	Negative	Negative	Negative	Negative	Negative	Adenocarcarcinoma（EGFR mutation)	Lung cancer	Training Cohort
Patient-250	ZY1966	20210827	Negative	Negative	Negative	Negative	Negative	Adenocarcarcinoma	Lung cancer	Training Cohort
Patient-251	ZY2082	20210906	Negative	Negative	Negative	Negative	Negative	Adenocarcarcinoma	Lung cancer	Training Cohort
Patient-252	ZY2099	20210907	Negative	Negative	Negative	Negative	Negative	Adenocarcarcinoma	Lung cancer	Training Cohort
Patient-253	ZY2103	20210907	Negative	Negative	Negative	Negative	Negative	Squamous cell carcinoma	Lung cancer	Training Cohort
Patient-254	ZY2132	20210908	Negative	Negative	Negative	Negative	Negative	Squamous cell carcinoma	Lung cancer	Training Cohort
Patient-255	ZY2146	20210909	Negative	Negative	Negative	Negative	Negative	Adenocarcarcinoma	Lung cancer	Training Cohort
Patient-256	ZY2158	20210910	Negative	Negative	Negative	Negative	Negative	Adenocarcarcinoma	Lung cancer	Training Cohort
Patient-257	ZY2161	20210910	Negative	Negative	Negative	Negative	Negative	Adenocarcarcinoma	Lung cancer	Training Cohort
Patient-258	ZY2162	20210910	Negative	Negative	Negative	Negative	Negative	Adenocarcarcinoma (RET+ mutation)	Lung cancer	Training Cohort
Patient-259	ZY2163	20210910	Negative	Negative	Negative	Negative	Negative	SCLC	Lung cancer	Training Cohort
Patient-260	ZY2164	20210910	Negative	Negative	Negative	Negative	Negative	SCLC	Lung cancer	Training Cohort
Patient-261	ZY2166	20210910	Negative	Negative	Negative	Negative	Negative	Adenocarcarcinoma	Lung cancer	Training Cohort
Patient-262	ZY2170	20210910	EBV_22	EBV_6	Negative	Negative	Negative	Adenocarcarcinoma	Lung cancer	Training Cohort
Patient-263	ZY2204	20210913	Negative	Negative	Negative	Negative	Negative	Adenocarcarcinoma	Lung cancer	Training Cohort
Patient-264	ZY2217	20210914	Negative	Negative	Negative	Negative	Negative	Squamous cell carcinoma	Lung cancer	Training Cohort
Patient-265	ZY2233	20210915	Negative	Negative	Negative	Negative	Negative	Adenocarcarcinoma	Lung cancer	Training Cohort
Patient-266	ZY2234	20210915	Negative	Negative	Negative	Negative	Negative	Adenocarcarcinoma	Lung cancer	Training Cohort
Patient-267	ZY2300	20210922	Negative	Negative	Negative	Negative	Negative	Adenocarcarcinoma	Lung cancer	Training Cohort
Patient-268	ZY2344	20210924	Negative	Negative	Negative	Negative	Negative	Adenocarcarcinoma	Lung cancer	Training Cohort
Patient-269	ZY2377	20210928	Negative	Negative	Negative	Negative	Negative	Squamous cell carcinoma	Lung cancer	Training Cohort
Patient-270	ZY2380	20210928	Tropheryma_whipplei_699	Negative	Negative	Negative	Negative	Adenocarcarcinoma	Lung cancer	Training Cohort
Patient-271	ZY2383	20210928	Candida_albicans_203, Pneumocystis_jirovecii_7, EBV_15	Candida_albicans_4	Negative	Negative	Negative	Adenocarcarcinoma	Lung cancer	Training Cohort
Patient-272	ZY2427	20211004	Negative	Negative	Negative	Negative	Negative	SCLC	Lung cancer	Training Cohort
Patient-273	ZY2458	20211006	Negative	Negative	Negative	Negative	Negative	Squamous cell carcinoma	Lung cancer	Training Cohort
Patient-274	ZY2521	20211011	EBV_4	EBV_6	Negative	Negative	Negative	Squamous cell carcinoma	Lung cancer	Training Cohort
Patient-275	ZY2617	20211016	Negative	Negative	Negative	Negative	Negative	Squamous cell carcinoma	Lung cancer	Training Cohort
Patient-276	ZY2619	20211016	Negative	Negative	Negative	Negative	Negative	Squamous cell carcinoma	Lung cancer	Training Cohort
Patient-277	ZY2651	20211019	Negative	Negative	Negative	Negative	Negative	Adenocarcarcinoma	Lung cancer	Training Cohort
Patient-278	ZY2673	20211020	Negative	Negative	Negative	Negative	Negative	Squamous cell carcinoma	Lung cancer	Training Cohort
Patient-279	ZY2711	20211022	Candida_albicans_357,062	CMV_11	Negative	Negative	Negative	Adenocarcarcinoma	Lung cancer	Training Cohort
Patient-280	ZY2756	20211026	Negative	Negative	Negative	Negative	Negative	SCLC	Lung cancer	Training Cohort
Patient-281	ZY2798	20211028	Negative	Negative	Negative	Negative	Negative	Squamous cell carcinoma	Lung cancer	Validation Cohort
Patient-282	ZY2821	20211029	Negative	Negative	Negative	Negative	Negative	Squamous cell carcinoma	Lung cancer	Validation Cohort
Patient-283	ZY2825	20211029	Negative	Negative	Negative	Negative	Negative	Adenocarcarcinoma	Lung cancer	Validation Cohort
Patient-284	ZY2938	20211106	Negative	Negative	Negative	Negative	Negative	Squamous cell carcinoma	Lung cancer	Validation Cohort
Patient-285	ZY2969	20211109	Negative	Negative	Negative	Negative	Negative	Squamous cell carcinoma	Lung cancer	Validation Cohort
Patient-286	ZY2971	20211109	Negative	Negative	Negative	Negative	Negative	Squamous cell carcinoma	Lung cancer	Validation Cohort
Patient-287	ZY2985	20211110	Negative	Negative	Negative	Negative	Negative	Squamous cell carcinoma	Lung cancer	Validation Cohort
Patient-288	ZY3035	20211113	Negative	Negative	Negative	Negative	Negative	Adenocarcarcinoma	Lung cancer	Validation Cohort
Patient-289	ZY3104	20211117	Negative	Negative	Negative	Negative	Negative	Squamous cell carcinoma	Lung cancer	Validation Cohort
Patient-290	ZY3227	20211125	Negative	Negative	Negative	Negative	Negative	Adenocarcarcinoma	Lung cancer	Validation Cohort
Patient-291	ZY3243	20211126	Negative	Negative	Negative	Negative	Negative	Squamous cell carcinoma	Lung cancer	Validation Cohort
Patient-292	ZY3257	20211127	Negative	Negative	Negative	Negative	Negative	Adenocarcarcinoma	Lung cancer	Validation Cohort
Patient-293	ZY3383	20211207	Negative	Negative	Negative	Negative	Negative	Adenocarcarcinoma	Lung cancer	Validation Cohort
Patient-294	ZY3396	20211208	Negative	Negative	Negative	Negative	Negative	Adenocarcarcinoma	Lung cancer	Validation Cohort
Patient-295	ZY3425	20211209	Negative	Negative	Negative	Negative	Negative	Adenocarcarcinoma(ALK mutation)	Lung cancer	Validation Cohort
Patient-296	ZY3445	20211210	Negative	Negative	Negative	Negative	Negative	Adenocarcarcinoma	Lung cancer	Validation Cohort
Patient-297	ZY3545	20211218	Negative	Negative	Negative	Negative	Negative	Squamous cell carcinoma	Lung cancer	Validation Cohort
Patient-298	ZY3584	20211222	Negative	Negative	Negative	Negative	Negative	Squamous cell carcinoma	Lung cancer	Validation Cohort
Patient-299	ZY3694	20211229	Negative	Negative	Negative	Negative	Negative	Adenocarcarcinoma	Lung cancer	Validation Cohort
Patient-300	ZY3695	20211229	Negative	Negative	Negative	Negative	Negative	Adenocarcarcinoma	Lung cancer	Validation Cohort
Patient-301	ZY3709	20211230	Negative	Negative	Negative	Negative	Negative	Adenocarcarcinoma	Lung cancer	Validation Cohort
Patient-302	ZY3710	20211230	Negative	Negative	Negative	Negative	Negative	Adenocarcarcinoma	Lung cancer	Validation Cohort
Patient-303	ZY3728	20211231	Negative	Negative	Negative	Negative	Negative	Adenocarcarcinoma	Lung cancer	Validation Cohort
Patient-304	ZY3783	20220105	Negative	Negative	Negative	Negative	Negative	Adenocarcarcinoma	Lung cancer	Validation Cohort
Patient-305	ZY3898	20220112	Negative	Negative	Negative	Negative	Negative	Adenocarcarcinoma	Lung cancer	Validation Cohort
Patient-306	ZY3920	20220113	Negative	Negative	Negative	Negative	Negative	Adenocarcarcinoma	Lung cancer	Validation Cohort
Patient-307	ZY3957	20220115	Negative	Negative	Negative	Negative	Negative	Adenocarcarcinoma	Lung cancer	Validation Cohort
Patient-308	ZY3964	20220115	Negative	Negative	Negative	Negative	Negative	Adenocarcarcinoma	Lung cancer	Validation Cohort
Patient-309	ZY4049	20220121	Negative	Negative	Negative	Negative	Negative	Squamous cell carcinoma	Lung cancer	Validation Cohort
Patient-310	ZY4050	20220121	Negative	Negative	Negative	Negative	Negative	SCLC	Lung cancer	Validation Cohort
Patient-311	ZY4069	20220122	Entercoccus_faecalis_658	Negative	Negative	Negative	Negative	Adenocarcarcinoma	Lung cancer	Validation Cohort
Patient-312	ZY4142	20220127	Negative	Negative	Negative	Negative	Negative	SCLC	Lung cancer	Validation Cohort
Patient-313	ZY4148	20220127	Negative	Negative	Negative	Negative	Negative	Adenocarcarcinoma	Lung cancer	Validation Cohort
Patient-314	ZY4406	20220217	Negative	Negative	Negative	Negative	Negative	Adenocarcarcinoma	Lung cancer	Validation Cohort
Patient-315	ZY4451	20220219	Pneumocystis_jirovecii_15	Negative	Negative	Negative	Negative	Adenocarcarcinoma(KRAS mutation)	Lung cancer	Validation Cohort
Patient-316	ZY4550	20220226	Negative	Negative	Negative	Negative	Negative	Adenocarcarcinoma(EGFR mutation)	Lung cancer	Validation Cohort
Patient-317	ZY119	20210309	Mycobacterium_tuberculosis_complex_14	Negative	Acid-fast bacilli	+	++	Negative	Pulmonary tuberculosis	Training Cohort
Patient-318	ZY227	20210323	Mycobacterium_tuberculosis_complex_6,038	Negative	Acid-fast bacilli	++	Negative	Negative	Pulmonary tuberculosis	Training Cohort
Patient-319	ZY385	20210410	Mycobacterium_tuberculosis_complex_82	Negative	Acid-fast bacilli	++	++	Negative	Pulmonary tuberculosis	Training Cohort
Patient-320	ZY429	20210414	Mycobacterium_tuberculosis_complex_173	Negative	Acid-fast bacilli	++	++	Negative	Pulmonary tuberculosis	Training Cohort
Patient-321	ZY501	20210422	Mycobacterium_tuberculosis_complex_2	Negative	Negative	Negative	Negative	Negative	Pulmonary tuberculosis	Training Cohort
Patient-322	ZY561	20210428	Mycobacterium_tuberculosis_complex_250	Negative	Acid-fast bacilli	++	++	Negative	Pulmonary tuberculosis	Training Cohort
Patient-323	ZY587	20210430	Mycobacterium_tuberculosis_complex_2132	Negative	Acid-fast bacilli	Negative	++	Negative	Pulmonary tuberculosis	Training Cohort
Patient-324	ZY630	20210507	Mycobacterium_tuberculosis_complex_1	Negative	Negative	+	++	Negative	Pulmonary tuberculosis	Training Cohort
Patient-325	ZY701	20210515	Mycobacterium_tuberculosis_complex_3177	Negative	Acid-fast bacilli	++	++	Negative	Pulmonary tuberculosis	Training Cohort
Patient-326	ZY707	20210517	Mycobacterium_tuberculosis_complex_8	Negative	Negative	+	++	Negative	Pulmonary tuberculosis	Training Cohort
Patient-327	ZY710	20210517	Mycobacterium_tuberculosis_complex_72, CMV_2120	Negative	Mycobacterium_tuberculosis	Negative	Negative	Negative	Pulmonary tuberculosis	Training Cohort
Patient-328	ZY796	20210525	Mycobacterium_tuberculosis_complex_7,128	Negative	Acid-fast bacilli	++	++	Negative	Pulmonary tuberculosis	Training Cohort
Patient-329	ZY813	20210526	Mycobacterium_tuberculosis_complex_2	Negative	Negative	Negative	++	Negative	Pulmonary tuberculosis	Training Cohort
Patient-330	ZY858	20210531	Mycobacterium_tuberculosis_complex_214, CMV_60	Negative	Negative	Negative	Negative	Negative	Pulmonary tuberculosis	Training Cohort
Patient-331	ZY928	20210604	Mycobacterium_tuberculosis_complex_1008	Mycobacterium_tuberculosis_complex_19	Acid-fast bacilli	++	++	Negative	Pulmonary tuberculosis	Training Cohort
Patient-332	ZY1107	20210622	Mycobacterium_tuberculosis_complex_1	Negative	Negative	Negative	++	Negative	Pulmonary tuberculosis	Training Cohort
Patient-333	ZY1164	20210626	Mycobacterium_tuberculosis_complex_1379	Mycobacterium_tuberculosis_complex_415	Negative	Negative	Negative	Negative	Pulmonary tuberculosis	Training Cohort
Patient-334	ZY1191	20210629	Mycobacterium_tuberculosis_complex_1,637	Negative	Negative	+++	Negative	Negative	Pulmonary tuberculosis	Training Cohort
Patient-335	ZY1192	20210629	Mycobacterium_tuberculosis_complex_5,622	Negative	Acid-fast bacilli	+++	++	Negative	Pulmonary tuberculosis	Training Cohort
Patient-336	ZY1207	20210630	Mycobacterium_tuberculosis_complex_369	Negative	Negative	Negative	++	Negative	Pulmonary tuberculosis	Training Cohort
Patient-337	ZY1355	20210713	Mycobacterium_tuberculosis_complex_194	Negative	Negative	+	++	Negative	Pulmonary tuberculosis	Training Cohort
Patient-338	ZY1367	20210714	Mycobacterium_tuberculosis_complex_1	Negative	Negative	+	Negative	Negative	Pulmonary tuberculosis	Training Cohort
Patient-339	ZY1413	20210719	Mycobacterium_tuberculosis_complex_47	Negative	Acid-fast bacilli	++	++	Negative	Pulmonary tuberculosis	Training Cohort
Patient-340	ZY1473	20210723	Mycobacterium_tuberculosis_complex_6	Negative	Negative	Negative	++	Negative	Pulmonary tuberculosis	Training Cohort
Patient-341	ZY1729	20210811	Mycobacterium_tuberculosis_complex_9	Negative	Negative	+	++	Negative	Pulmonary tuberculosis	Training Cohort
Patient-342	ZY1759	20210813	Mycobacterium_tuberculosis_complex_，71	Negative	Negative	+	Negative	Negative	Pulmonary tuberculosis	Training Cohort
Patient-343	ZY1936	20210825	Mycobacterium_tuberculosis_complex_8,330	Negative	Acid-fast bacilli	+	++	Negative	Pulmonary tuberculosis	Training Cohort
Patient-344	ZY1977	20210828	Mycobacterium_tuberculosis_complex_280, Pneumocystis_jirovecii_7	Pneumocystis_jirovecii_131	Negative	++	Negative	Negative	Pulmonary tuberculosis	Training Cohort
Patient-345	ZY2002	20210831	Mycobacterium_tuberculosis_complex_6,552	Mycobacterium_tuberculosis_complex_74	Acid-fast bacilli	++	++	Negative	Pulmonary tuberculosis	Training Cohort
Patient-346	ZY2031	20210902	Mycobacterium_tuberculosis_complex_3	Negative	Negative	Negative	+	Negative	Pulmonary tuberculosis	Training Cohort
Patient-347	ZY2165	20210910	Mycobacterium_tuberculosis_complex_24	Negative	Acid-fast bacilli	+	++	Negative	Pulmonary tuberculosis	Training Cohort
Patient-348	ZY2219	20210914	Mycobacterium_tuberculosis_complex_1,179	Mycobacterium_tuberculosis_complex_8	Acid-fast bacilli	+++	Negative	Negative	Pulmonary tuberculosis	Training Cohort
Patient-349	ZY2244	20210916	Mycobacterium_tuberculosis_complex_2	Negative	Negative	+	++	Negative	Pulmonary tuberculosis	Training Cohort
Patient-350	ZY2246	20210916	Mycobacterium_tuberculosis_complex_20	Negative	Negative	+	Negative	Negative	Pulmonary tuberculosis	Training Cohort
Patient-351	ZY2299	20210922	Mycobacterium_tuberculosis_complex_3,418	Mycobacterium_tuberculosis_complex_4	Negative	+	++	Negative	Pulmonary tuberculosis	Training Cohort
Patient-352	ZY2320	20210923	Mycobacterium_tuberculosis_complex_101	Negative	Negative	+	++	Negative	Pulmonary tuberculosis	Training Cohort
Patient-353	ZY2321	20210923	Negative	Negative	Negative	+	TSPOT	Negative	Pulmonary tuberculosis	Training Cohort
Patient-354	ZY2326	20210923	Mycobacterium_tuberculosis_complex_21	Negative	Acid-fast bacilli	+	++	Negative	Pulmonary tuberculosis	Training Cohort
Patient-355	ZY2338	20210924	Mycobacterium_tuberculosis_complex_1	Negative	Negative	+	++	Negative	Pulmonary tuberculosis	Training Cohort
Patient-356	ZY2345	20210924	Mycobacterium_tuberculosis_complex_9	Negative	Negative	Negative	++	Negative	Pulmonary tuberculosis	Training Cohort
Patient-357	ZY2496	20211008	Mycobacterium_tuberculosis_complex_16	Negative	Negative	+	++	Negative	Pulmonary tuberculosis	Training Cohort
Patient-358	ZY2702	20211022	Mycobacterium_tuberculosis_complex_3,873	Mycobacterium_tuberculosis_complex_5	Acid-fast bacilli	+++	++	Negative	Pulmonary tuberculosis	Training Cohort
Patient-359	ZY2706	20211022	Mycobacterium_tuberculosis_complex_31	Negative	Negative	+	++	Negative	Pulmonary tuberculosis	Training Cohort
Patient-360	ZY2712	20211022	Mycobacterium_tuberculosis_complex_201	Mycobacterium_tuberculosis_complex_2	Negative	Negative	++	Negative	Pulmonary tuberculosis	Training Cohort
Patient-361	ZY2875	20211103	Mycobacterium_tuberculosis_complex_5	Negative	Negative	Negative	++	Negative	Pulmonary tuberculosis	Training Cohort
Patient-362	ZY2878	20211103	Mycobacterium_tuberculosis_complex_2	Negative	Negative	Negative	++	Negative	Pulmonary tuberculosis	Training Cohort
Patient-363	ZY2896	20211104	Mycobacterium_tuberculosis_complex_14	Negative	Negative	Negative	++	Negative	Pulmonary tuberculosis	Training Cohort
Patient-364	ZY2904	20211104	Mycobacterium_tuberculosis_complex_269	Negative	Negative	++	Negative	Negative	Pulmonary tuberculosis	Training Cohort
Patient-365	ZY3015	20211112	Mycobacterium_tuberculosis_complex_1, Candida_albicans_482	Negative	Negative	Negative	++	Negative	Pulmonary tuberculosis	Training Cohort
Patient-366	ZY3129	20211118	Mycobacterium_tuberculosis_complex_148	Negative	Negative	+	++	Negative	Pulmonary tuberculosis	Training Cohort
Patient-367	ZY3144	20211119	Mycobacterium_tuberculosis_complex_18	Negative	Negative	Negative	++	Negative	Pulmonary tuberculosis	Training Cohort
Patient-368	ZY3158	20211120	Mycobacterium_tuberculosis_complex_6	Negative	Acid-fast bacilli	+	++	Negative	Pulmonary tuberculosis	Training Cohort
Patient-369	ZY3187	20211123	Mycobacterium_tuberculosis_complex_38	Negative	Acid-fast bacilli	+	++	Negative	Pulmonary tuberculosis	Training Cohort
Patient-370	ZY3210	20211124	Mycobacterium_tuberculosis_complex_6, Pneumocystis_jirovecii_2	Negative	Negative	+	++	Negative	Pulmonary tuberculosis	Training Cohort
Patient-371	ZY3241	20211126	Mycobacterium_tuberculosis_complex_2	Negative	Negative	+	++	Negative	Pulmonary tuberculosis	Training Cohort
Patient-372	ZY3258	20211127	Mycobacterium_tuberculosis_complex_150	Negative	Negative	Negative	Negative	Negative	Pulmonary tuberculosis	Training Cohort
Patient-373	ZY3287	20211130	Mycobacterium_tuberculosis_complex_5	Negative	Negative	Negative	++	Negative	Pulmonary tuberculosis	Training Cohort
Patient-374	ZY3347	20211203	Mycobacterium_tuberculosis_complex_159	Negative	Acid-fast bacilli	++	++	Negative	Pulmonary tuberculosis	Training Cohort
Patient-375	ZY3357	20211204	Mycobacterium_tuberculosis_complex_47	Negative	Negative	Negative	++	Negative	Pulmonary tuberculosis	Training Cohort
Patient-376	ZY3378	20211207	Mycobacterium_tuberculosis_complex_484	Negative	Acid-fast bacilli	++	++	Negative	Pulmonary tuberculosis	Training Cohort
Patient-377	ZY3423	20211209	Mycobacterium_tuberculosis_complex_99	Mycobacterium_tuberculosis_complex_3	Negative	Negative	Negative	Negative	Pulmonary tuberculosis	Training Cohort
Patient-378	ZY3510	20211216	Mycobacterium_tuberculosis_complex_7	Mycobacterium_tuberculosis_complex_1	Acid-fast bacilli	+	Negative	Negative	Pulmonary tuberculosis	Validation Cohort
Patient-379	ZY3587	20211222	Mycobacterium_tuberculosis_complex_7	Negative	Negative	Negative	++	Negative	Pulmonary tuberculosis	Validation Cohort
Patient-380	ZY3622	20211224	Mycobacterium_tuberculosis_complex_1,776	Mycobacterium_tuberculosis_complex_7	Acid-fast bacilli	++	++	Negative	Pulmonary tuberculosis	Validation Cohort
Patient-381	ZY3770	20220104	Negative	Negative	Negative	+	++	Negative	Pulmonary tuberculosis	Validation Cohort
Patient-382	ZY3782	20220105	Mycobacterium_tuberculosis_complex_3	Negative	Acid-fast bacilli	Negative	Negative	Negative	Pulmonary tuberculosis	Validation Cohort
Patient-383	ZY3795	20220106	Mycobacterium_tuberculosis_complex_1,162	Negative	Negative	Negative	++	Negative	Pulmonary tuberculosis	Validation Cohort
Patient-384	ZY4144	20220127	Negative	Negative	Negative	Negative	++	Negative	Pulmonary tuberculosis	Validation Cohort
Patient-385	ZY4526	20220225	Mycobacterium_tuberculosis_complex_128	Negative	Negative	+	++	Negative	Pulmonary tuberculosis	Validation Cohort
Patient-386	ZY4551	20220226	Mycobacterium_tuberculosis_complex_24	Negative	Negative	+	++	Negative	Pulmonary tuberculosis	Validation Cohort
Patient-387	ZY4745	20220310	Mycobacterium_tuberculosis_complex_968	Negative	Acid-fast bacilli	++	++	Negative	Pulmonary tuberculosis	Validation Cohort
Patient-388	ZY6727	20220625	Mycobacterium_tuberculosis_complex_3	Negative	Negative	+	Negative	Negative	Pulmonary tuberculosis	Validation Cohort
Patient-389	ZY14316	20230504	Mycobacterium_tuberculosis_complex_9	Negative	Negative	Negative	Negative	Negative	Pulmonary tuberculosis	Validation Cohort
Patient-390	ZY14372	20230505	Mycobacterium_tuberculosis_complex_610	Negative	Negative	Negative	Negative	Negative	Pulmonary tuberculosis	Validation Cohort
Patient-391	ZY14467	20230509	Mycobacterium_tuberculosis_complex_227	Negative	Negative	Negative	Negative	Negative	Pulmonary tuberculosis	Validation Cohort
Patient-392	ZY14509	20230510	Mycobacterium_tuberculosis_complex_69	Negative	Negative	Negative	Negative	Negative	Pulmonary tuberculosis	Validation Cohort
Patient-393	ZY14510	20230510	Mycobacterium_tuberculosis_complex_3	Negative	Negative	Negative	Negative	Negative	Pulmonary tuberculosis	Validation Cohort
Patient-394	ZY14562	20230512	Mycobacterium_tuberculosis_complex_15	Negative	Negative	Negative	Negative	Negative	Pulmonary tuberculosis	Validation Cohort
Patient-395	ZY14702	20230517	Mycobacterium_tuberculosis_complex_7,540	Mycobacterium_tuberculosis_complex_90	Negative	Negative	Negative	Negative	Pulmonary tuberculosis	Validation Cohort
Patient-396	ZY14707	20230517	Mycobacterium_tuberculosis_complex_16	Negative	Negative	Negative	Negative	Negative	Pulmonary tuberculosis	Validation Cohort
Patient-397	ZY14730	20230518	Mycobacterium_tuberculosis_complex_237	Negative	Negative	Negative	Negative	Negative	Pulmonary tuberculosis	Validation Cohort
Patient-398	ZY14955	20230526	Mycobacterium_tuberculosis_complex_14	Negative	Negative	Negative	Negative	Negative	Pulmonary tuberculosis	Validation Cohort
Patient-399	ZY15069	20230530	Mycobacterium_tuberculosis_complex_ 170,727	Negative	Negative	Negative	Negative	Negative	Pulmonary tuberculosis	Validation Cohort
Patient-400	ZY15215	20230603	Mycobacterium_tuberculosis_complex_123	Negative	Negative	Negative	Negative	Negative	Pulmonary tuberculosis	Validation Cohort
Patient-401	ZY15276	20230606	Mycobacterium_tuberculosis_complex_4	Negative	Negative	Negative	Negative	Negative	Pulmonary tuberculosis	Validation Cohort
Patient-402	ZY15284	20230606	Mycobacterium_tuberculosis_complex_1,080	Negative	Negative	Negative	Negative	Negative	Pulmonary tuberculosis	Validation Cohort

## Sheet: Extended Data Table S2 
Table S2. Microbiological results and diagnosis of Negative Control patients
Patients ID	Collecation Date	Library ID	BAL microbiology	mNGS DNA Pathogen_Reads number	mNGS RNA Pathogen_Reads number	Diagnosis
220406MCX00010	20220406	ZY5162	Negative	Negative	Negative	idiopathic pulmonary fibrosis
20210611MCX006	20210611	ZY1009	Negative	Negative	Negative	organising pneumonia
20210825MCX011	20210825	ZY1935	Negative	Negative	Negative	organising pneumonia
20220317MCX017	20220317	ZY4871	Negative	Negative	Negative	organising pneumonia
20220303MCX007	20220303	ZY4623	Negative	Negative	Negative	hypersensitivity pneumonitis
220422MCX00014	20220422	ZY5484	Negative	CMV_24	Negative	organising pneumonia
20210520MCX014	20210520	ZY750	Negative	Negative	Negative	hypersensitivity pneumonitis
20210813MCX014	20210813	ZY1764	Negative	EBV_1	Negative	idiopathic pulmonary fibrosis
20210920MCX011	20210920	ZY2286	Negative	Negative	Negative	hypersensitivity pneumonitis
20220110MCX013	20220110	ZY3854	Negative	HHV7_3	Negative	organising pneumonia
20220217MCX018	20220217	ZY4412	Negative	Negative	Negative	organising pneumonia
20220218MCX013	20220218	ZY4430	Negative	Negative	Negative	hypersensitivity pneumonitis
20220315MCX021	20220315	ZY4833	Negative	Negative	Negative	hypersensitivity pneumonitis
220412MCX00011	20220412	ZY5275	Negative	Negative	Negative	hypersensitivity pneumonitis
220421MCX00016	20220421	ZY5462	Negative	Negative	Negative	hypersensitivity pneumonitis
220615MCX00015	20220615	ZY6502	Negative	Negative	Negative	benign pulmonary nodules
220428MCX00013	20220428	ZY5595	Negative	Negative	Negative	benign pulmonary nodules
220517MCX00014	20220517	ZY5921	Negative	Negative	Negative	hypersensitivity pneumonitis
20210414MCX011	20210414	ZY427	Negative	Negative	Negative	benign pulmonary nodules
20211103MCX003	20211103	ZY2876	Negative	HHV6B_725	HHV6B_2	organising pneumonia
20220125MCX017	20220125	ZY4101	Negative	Negative	Negative	hypersensitivity pneumonitis
20220310MCX025	20220310	ZY4744	Negative	Negative	Negative	benign pulmonary nodules
20220330MCX012	20220330	ZY5062	Negative	EBV_4	Negative	pulmonary alveolar proteinosis
20220331MCX010	20220331	ZY5079	Negative	HHV7_3	Negative	pulmonary atelectasis
20210810MCX011	20210810	ZY1709	Negative	CMV_5	Negative	benign pulmonary nodules
20211021MCX014	20211021	ZY2693	Negative	Negative	Negative	benign pulmonary nodules
20210727MCX013	20210727	ZY1521	Negative	Negative	Negative	benign pulmonary nodules
20210612MCX014	20210612	ZY1027	Negative	Negative	Negative	pulmonary alveolar proteinosis
20210908MCX018	20210908	ZY2131	Negative	CMV_3	Negative	pulmonary alveolar proteinosis
20210819MCX014	20210819	ZY1851	Negative	Negative	Negative	pulmonary atelectasis
20211118MCX007	20211118	ZY3121	Negative	Negative	Negative	benign pulmonary nodules
20211124MCX015	20211124	ZY3206	Negative	EBV_3	Negative	idiopathic pulmonary fibrosis

## Sheet: Extended Data Table S3
Table S3. Performance of different models to classify lung cancer and infection
	Model	Dataset	AUC	95% CI	Sensitivity	Specificity
Lung Cancer vs Pulmonary Infection	Model1	Train set	0.603283	[0.581, 0.626]	0.703046	0.506897
	Model2	Train set	0.781467	[0.763, 0.799]	0.771574	0.68046
	Model3	Train set	0.81659	[0.801, 0.832]	0.704061	0.805747
	Model4	Train set	0.682208	[0.66, 0.704]	0.728934	0.551724
	Model5	Train set	0.623289	[0.6, 0.646]	0.736548	0.489655
	Model6	Train set	0.869974	[0.857, 0.883]	0.737563	0.844828
	Model1	Validation set	0.518801	[0.5, 0.539]	0.890244	0.25
	Model2	Validation set	0.632791	[0.618, 0.647]	0.658537	0.666667
	Model3	Validation set	0.788957	[0.774, 0.803]	0.621951	0.861111
	Model4	Validation set	0.629404	[0.609, 0.65]	0.621951	0.611111
	Model5	Validation set	0.509824	[0.491, 0.529]	0.963415	0.138889
	Model6	Validation set	0.830962	[0.819, 0.843]	0.670732	0.944444
Lung Cancer vs Bacterial Infection	Model1	Train set	0.753884	[0.731, 0.777]	0.7625	0.663218
	Model2	Train set	0.795498	[0.774, 0.817]	0.735	0.782759
	Model3	Train set	0.856559	[0.839, 0.874]	0.74375	0.85977
	Model4	Train set	0.700895	[0.676, 0.726]	0.7825	0.528736
	Model5	Train set	0.681373	[0.655, 0.708]	0.53125	0.816092
	Model6	Train set	0.884828	[0.869, 0.901]	0.785	0.837931
	Model1	Validation set	0.702614	[0.682, 0.724]	0.588235	0.777778
	Model2	Validation set	0.663807	[0.646, 0.682]	0.441176	0.888889
	Model3	Validation set	0.839052	[0.821, 0.856]	0.735294	0.888889
	Model4	Validation set	0.646242	[0.623, 0.669]	0.647059	0.666667
	Model5	Validation set	0.577614	[0.556, 0.601]	0.852941	0.361111
	Model6	Validation set	0.848856	[0.834, 0.864]	0.676471	0.916667
Lung Cancer vs Fungal Infection	Model1	Train set	0.735399	[0.709, 0.761]	0.878571	0.531034
	Model2	Train set	0.805358	[0.783, 0.828]	0.830357	0.670115
	Model3	Train set	0.887673	[0.871, 0.904]	0.826786	0.817241
	Model4	Train set	0.676771	[0.648, 0.705]	0.658929	0.588506
	Model5	Train set	0.689072	[0.66, 0.718]	0.682143	0.667816
	Model6	Train set	0.86782	[0.849, 0.887]	0.791071	0.814943
	Model1	Validation set	0.669082	[0.645, 0.693]	0.347826	0.944444
	Model2	Validation set	0.778382	[0.757, 0.801]	0.956522	0.638889
	Model3	Validation set	0.695652	[0.683, 0.709]	0.73913	0.722222
	Model4	Validation set	0.53744	[0.514, 0.56]	1	0.166667
	Model5	Validation set	0.608696	[0.583, 0.635]	0.565217	0.666667
	Model6	Validation set	0.81099	[0.793, 0.829]	0.826087	0.777778
Lung Cancer vs Tuberculosis	Model1	Train set	0.811907	[0.79, 0.834]	0.67377	0.806897
	Model2	Train set	0.788154	[0.765, 0.812]	0.655738	0.787356
	Model3	Train set	0.924184	[0.912, 0.937]	0.863934	0.829885
	Model4	Train set	0.710671	[0.684, 0.738]	0.716393	0.588506
	Model5	Train set	0.656541	[0.628, 0.685]	0.431148	0.87931
	Model6	Train set	0.957309	[0.949, 0.966]	0.921311	0.854023
	Model1	Validation set	0.742222	[0.722, 0.762]	0.84	0.583333
	Model2	Validation set	0.752778	[0.731, 0.776]	0.88	0.638889
	Model3	Validation set	0.846667	[0.836, 0.859]	0.96	0.611111
	Model4	Validation set	0.602222	[0.579, 0.625]	0.96	0.25
	Model5	Validation set	0.559444	[0.535, 0.584]	0.72	0.444444
	Model6	Validation set	0.882222	[0.875, 0.891]	0.84	0.777778

## Sheet: Extended Data Table S4
Table S4. Features of Model6 among all comparisons
	Feature	Importance score
Lung Cancer vs Pulmonary Infection	B3GAT1	7.51045
	GSAT:centr:Satellite	7.2137
	ULBP1	7.12285
	CCL13	7.11612
	RNA:Ralstonia_solanacearum	6.67478
	PPIP5K1P1-CATSPER2	6.5075
	SNORD15B	6.48475
	AP1AR	6.20469
	RNA:Providencia_rettgeri	5.76025
	RNF114	5.42807
	RNA:Acinetobacter_pittii	5.09446
	TPTE2P5	5.0093
	TAS2R4	4.81829
	CNV-chr4percent	3.87781
	DNA:Streptococcus_oralis	3.74414
	CNV-chr3percent	3.3423
	RNA:Proteus_penneri	3.31897
	DNA:Candida_dubliniensis	1.09838
	DNA:Mycobacterium_tuberculosis	0.494714
	DNA:Stenotrophomonas_sp._PAMC25021	0.487647
	DNA:Human_betaherpesvirus_7	0.151261
Lung Cancer vs Bacterial Infection	CEP83-DT	8.75764
	CCNE1	6.63516
	MAS1	6.54624
	B3GAT1	6.3026
	TTTY15	5.82932
	ULBP1	5.24185
	AluYb9:Alu:SINE	4.91789
	CCN6	4.44854
	DNA:Veillonella_parvula	4.37216
	LOC100131532	4.05918
	CNV-chr5num	2.85751
	DNA:Filifactor_alocis	2.20261
	RNA:Parvimonas_micra	2.13878
	DNA:Mycobacterium_intracellulare	0.1809
Lung Cancer vs Fungal Infection	RNA:Pseudomonas_putida	13.1121
	ZPLD2P	9.1345
	LCMT1-AS1	8.27207
	DNA:Cryptococcus_neoformans	4.57595
	DNA:Treponema_denticola	2.96533
	DNA:Pseudomonas_aeruginosa	1.52701
	DNA:Human_betaherpesvirus_7	1.03945
Lung Cancer vs Tuberculosis	AREG	6.83277
	ATR	6.74128
	TACC3	5.57773
	CD163L1	5.17582
	BTN3A1	4.94347
	APOBEC3G	4.64741
	DNA:Mycobacterium_tuberculosis	4.64156
	SAR:Satellite:Satellite	3.95283
	LAP3	3.48162
	HSATI:Satellite:Satellite	2.05504
	DNA:Rhodococcus_sp._YL-1	1.14712
	CNV-chr3percent	1.13806
	CNV-chr22num	0.953617
	UCON61:UCON61:Unknown	0.726281
	RNA:Mycobacterium_tuberculosis	0.397296
	DNA:Human_betaherpesvirus_7	0.37771
	DNA:Neisseria_cinerea	0.223393
	DNA:Corynebacterium_jeikeium	0.0804636
